# Supplementary material for: The Probiotics in Pregnancy Study (PiP Study): rationale and design of a double-blind randomised controlled trial to improve maternal health during pregnancy and prevent infant eczema and allergy
Source: Springer Nature journal article supplement (doi:10.1186/s12884-016-0923-y), 2016-06-03
Supplement: MOESM3 [file 10243816]

**Table 4: Quality data for faecal samples**

| <b>Maternal Faecal Samples</b>                                                                                                                                                                                                                                                                                                     | <b>Infant Faecal Samples</b>                                                                                                                                                                                                                                                                                                                                                                                                    |
|------------------------------------------------------------------------------------------------------------------------------------------------------------------------------------------------------------------------------------------------------------------------------------------------------------------------------------|---------------------------------------------------------------------------------------------------------------------------------------------------------------------------------------------------------------------------------------------------------------------------------------------------------------------------------------------------------------------------------------------------------------------------------|
| <ol style="list-style-type: none"><li>1. Date sample faecal sample collected.</li><li>2. Duration (in minutes) sample was kept at room temperature before being placed in home freezer: A: 0 - &lt;5mins, B: 5 - &lt;10mins, C: 10 - &lt;15mins, D: ≥ 15 mins (specify).</li><li>3. Date sample placed in -80°C freezer.</li></ol> | <ol style="list-style-type: none"><li>1. Date and time faecal sample collected.</li><li>2. Whether sample was collected more than 10 mins after child defecated.</li><li>3. Whether the nappy was wet with urine at time of collection.</li><li>4. Duration (in minutes) sample was kept at room temperature before being placed in home freezer.</li><li>5. Date and time faecal sample was placed in -80°C freezer.</li></ol> |
