# Supplementary material for: The Probiotics in Pregnancy Study (PiP Study): rationale and design of a double-blind randomised controlled trial to improve maternal health during pregnancy and prevent infant eczema and allergy
Source: Springer Nature journal article supplement (doi:10.1186/s12884-016-0923-y), 2016-06-03
Supplement: MOESM4 [file 10243816]

**Table 5: Cord blood and tissue collection, processing and quality data**

|                                        | <b>Cord Blood</b>                                                                                                                                                  |                                                                                                                                                                                                                                                                                                                                                                                                                                                                                                                 | <b>Cord Tissue</b>                                                                                                                                                                                                                                                                                            |
|----------------------------------------|--------------------------------------------------------------------------------------------------------------------------------------------------------------------|-----------------------------------------------------------------------------------------------------------------------------------------------------------------------------------------------------------------------------------------------------------------------------------------------------------------------------------------------------------------------------------------------------------------------------------------------------------------------------------------------------------------|---------------------------------------------------------------------------------------------------------------------------------------------------------------------------------------------------------------------------------------------------------------------------------------------------------------|
| <b>Sample</b>                          | 6 ml cord blood                                                                                                                                                    | 10-35 ml cord blood                                                                                                                                                                                                                                                                                                                                                                                                                                                                                             | 2 x ½-1 cm sections cord tissue                                                                                                                                                                                                                                                                               |
| <b>Sample collected into</b>           | 1 x 6 ml K2EDTA 10.8 mg tube (BD Diagnostics catalogue number 367873)                                                                                              | 1 x 50 ml sterile light protected tube containing 20mls RPMI 1640 Medium (Gibco, 11875101 Life Technologies) and 750 units sodium heparin in saline with pH adjusted to 7.23 - 7.60 using sterile hydrochloric acid or sodium hydroxide if necessary                                                                                                                                                                                                                                                            | 1 x 70 ml specimen jar (non-sterile) containing 20-30 ml Dulbecco's phosphate-buffered saline (DPBS Invitrogen Catalogue 14190-250)                                                                                                                                                                           |
| <b>Transport</b>                       | On ice                                                                                                                                                             | Ambient                                                                                                                                                                                                                                                                                                                                                                                                                                                                                                         | On ice or ambient                                                                                                                                                                                                                                                                                             |
| <b>Laboratory processing</b>           | Centrifuge at 2200g for 10 min at 4°C<br>Aliquot plasma into 3 cryovials,<br>Mix remaining cell pallet and aliquot into 3 further cryovials<br>Freeze all at -80°C | Cord blood is processed using a protocol adapted from the 'BIO Cord Blood Processing – Double Layering' protocol from Childhood Allergy and Immunology Research (C.A.I.R.), School of Pediatrics and Child Health at the University of Western Australia<br>Plasma in RPMI is separated from the whole blood and frozen at -80°C<br>Red blood cells and granulocytes are frozen at -80°C<br>Mononuclear cells (monocytes and lymphocytes) are frozen at a concentration of 20 million per ml in liquid nitrogen | Drain off DPBS solution. Pour in more solution then drain off again<br>1 piece cord tissue in empty cryovial<br>2 <sup>nd</sup> piece of cord tissue placed into another cryovial and sample covered with RNAlater® Stabilization Solution (Ambion, AM7020 Life Technologies)<br>Both samples stored at -80°C |
| <b>Quality data</b>                    | Date and time of sample collection                                                                                                                                 |                                                                                                                                                                                                                                                                                                                                                                                                                                                                                                                 |                                                                                                                                                                                                                                                                                                               |
|                                        | Time sample placed on ice                                                                                                                                          |                                                                                                                                                                                                                                                                                                                                                                                                                                                                                                                 |                                                                                                                                                                                                                                                                                                               |
|                                        | Date and time of arrival at laboratory                                                                                                                             |                                                                                                                                                                                                                                                                                                                                                                                                                                                                                                                 |                                                                                                                                                                                                                                                                                                               |
|                                        | Confirmation sample arrives at laboratory on ice                                                                                                                   | Date and time processing began.<br>(Note samples more than 12 hours old or less than 10 ml of cord blood are discarded)                                                                                                                                                                                                                                                                                                                                                                                         |                                                                                                                                                                                                                                                                                                               |
| Date and time processed samples frozen |                                                                                                                                                                    | Date and time processed samples frozen                                                                                                                                                                                                                                                                                                                                                                                                                                                                          |                                                                                                                                                                                                                                                                                                               |
