# Supplementary material for: The Probiotics in Pregnancy Study (PiP Study): rationale and design of a double-blind randomised controlled trial to improve maternal health during pregnancy and prevent infant eczema and allergy
Source: Springer Nature journal article supplement (doi:10.1186/s12884-016-0923-y), 2016-06-03
Supplement: MOESM5 [file 10243816]

**Table 6: Quality data for breast milk samples**

|                                         |                                                                                                                                                                                                                                                                                                                                                                                           |
|-----------------------------------------|-------------------------------------------------------------------------------------------------------------------------------------------------------------------------------------------------------------------------------------------------------------------------------------------------------------------------------------------------------------------------------------------|
| <b>Data completed by women</b>          | <ol style="list-style-type: none"><li>1. Date and time sample collected</li><li>2. Sample collected from Right breast / Left Breast / Both Breasts (circle)</li><li>3. Time last fed from Left breast___:___ am/pm Right Breast___:___ am/pm</li></ol>                                                                                                                                    |
| <b>Data collected by research staff</b> | <ol style="list-style-type: none"><li>1. At time of sample pickup, the sample was: frozen/chilled/fresh</li><li>2. Duration sample was at room temperature after the woman completed collecting the sample before it was chilled or frozen:<br/>A: 0 - &lt;5mins, B: 5 - &lt;10mins, C: 10 - &lt;15mins, D: ≥ 15 mins (specify)</li><li>3. Date and time sample stored at -80°C</li></ol> |
